# Supplementary material for: Non-enzymatic electrochemical determination of salivary cortisol using ZnO-graphene nanocomposites
Source: Royal Society of Chemistry journal article supplement (doi:10.1039/d1ra07366d), 2021-01-01
Supplement: d1ra07366d1.pdf [file d1ra07366d1.pdf]

## Supplementary File

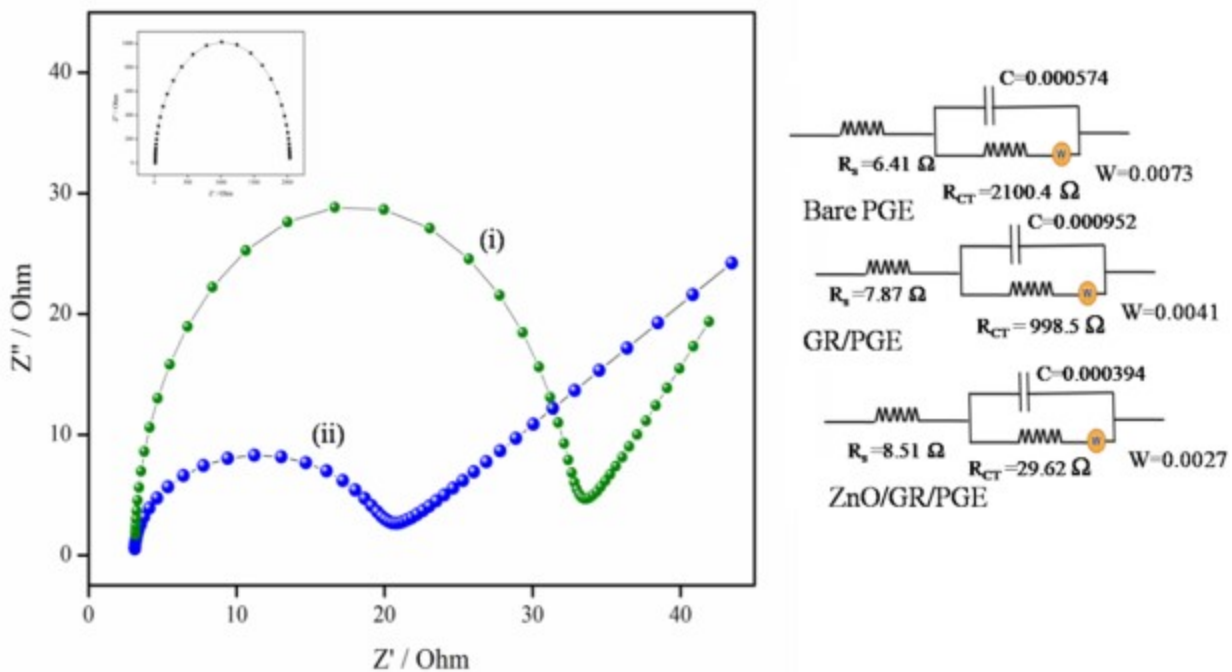

**Fig. 1S.** Nyquist plots of (inset) bare PGE, (i) GR/PGE, (ii) ZnO/GR/PGE in 1 mM  $K_4[Fe(CN)_6]$  /  $K_3[Fe(CN)_6]$  solutions containing 1 M KCl.

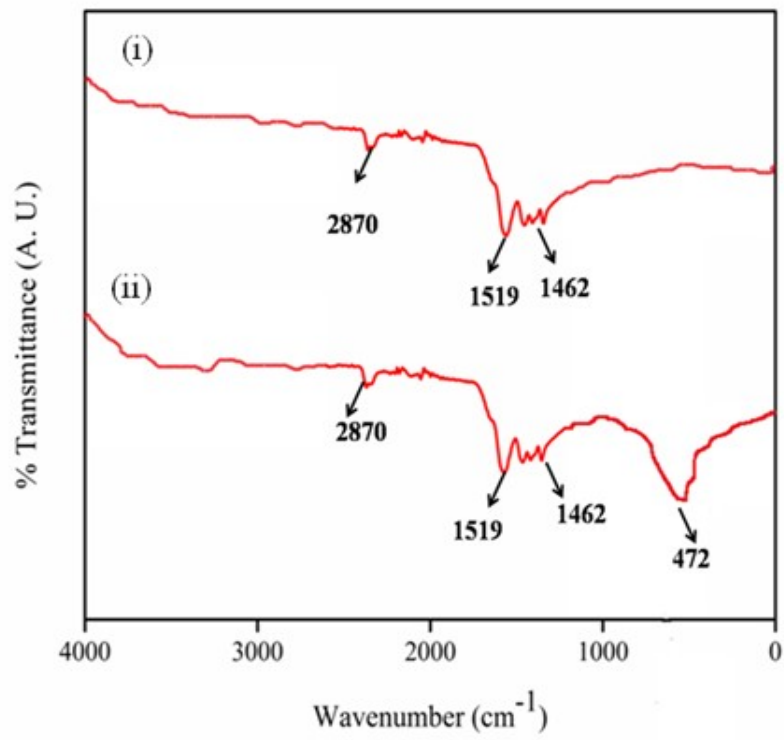

**Fig. 2S.** IR Spectrum of (i) GR/PGE and (ii) ZnO /GR/PGE.

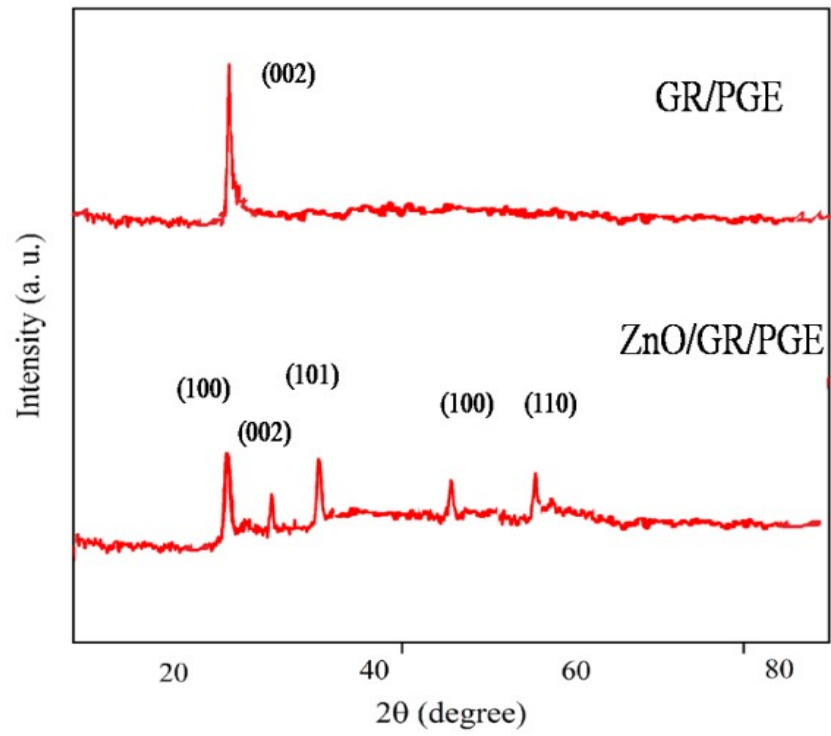

Fig. 3S. XRD patterns of GR/PGE and ZnO/GR/PGE

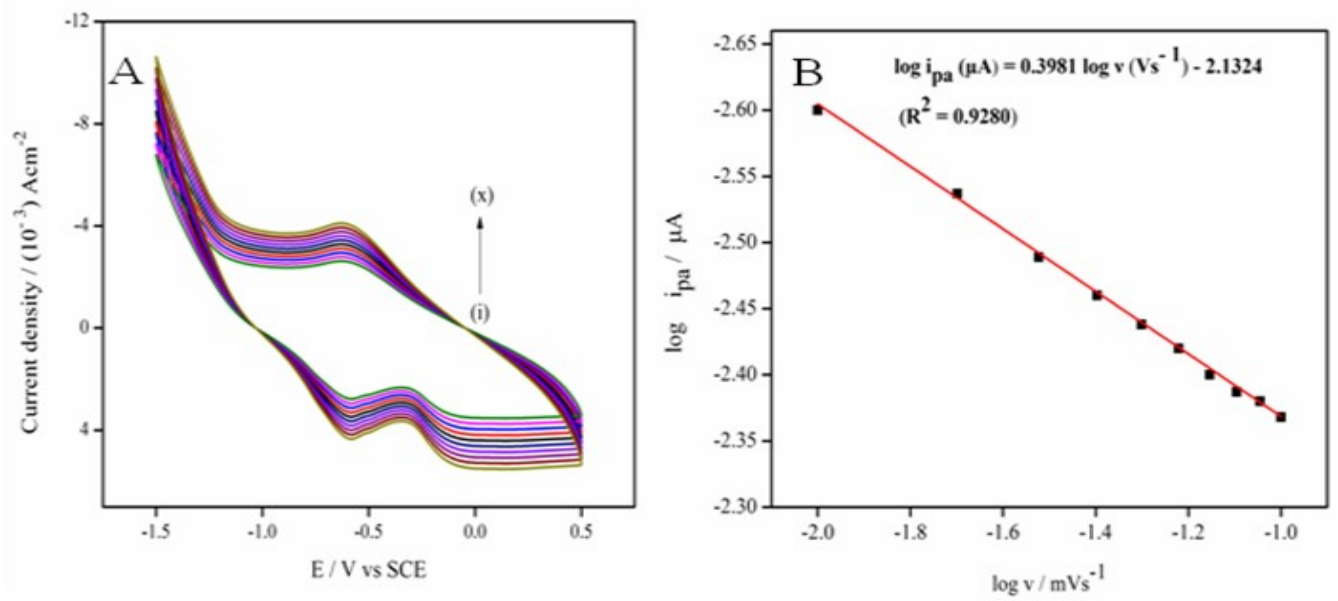

**Fig. 4S.** (A) Cyclic voltammograms of 6 nM Cortisol at ZnO/GR/PGE with varying scan rates from (i) 0.01 V/s (xi) 0.10 V/s (B) Plot of logarithm of cathodic peak currents against logarithm of scan rate.

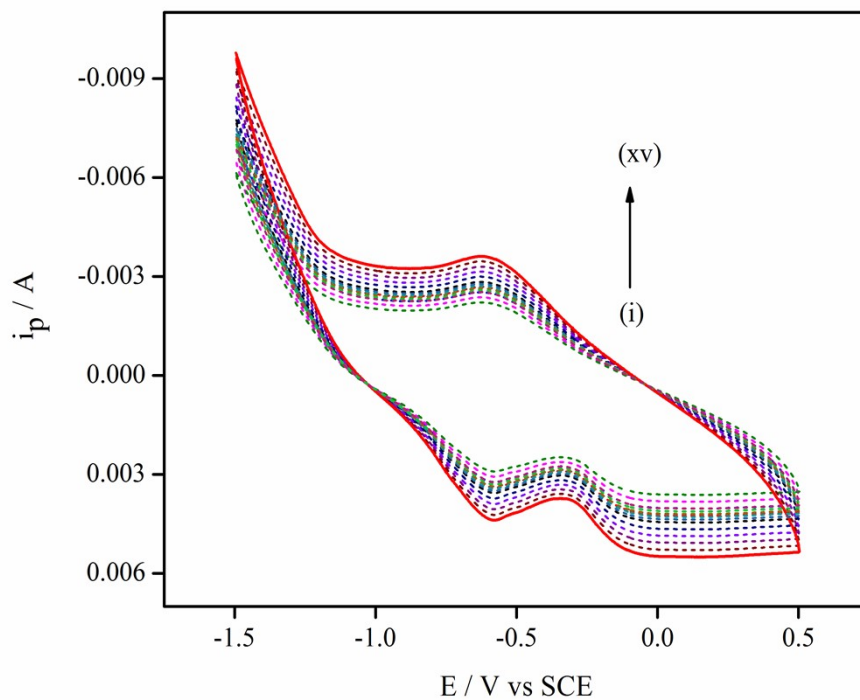

**Fig. 5S.** Effect of number of cycles on ZnO deposition on GR/PGE towards electrocatalytic detection of cortisol.

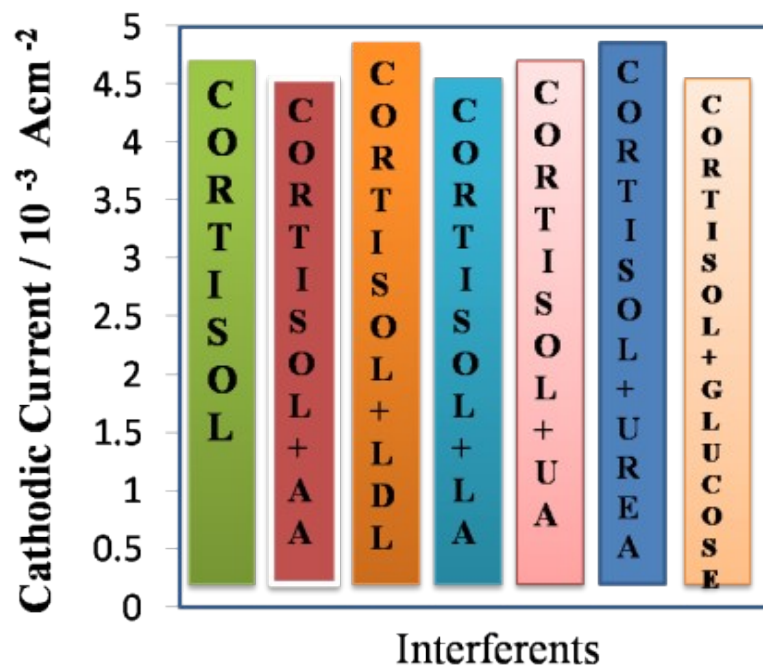

**Fig. 6S.** Variation in cathodic peak current of cortisol with the presence of different interferents

**Table 1S.** A comparative study of linear range and limit of detection for the determination of cortisol with other sensors.

| Working electrode                                                                         | Technique       | Linear dynamic range                                | Limit of detection | Refs.        |
|-------------------------------------------------------------------------------------------|-----------------|-----------------------------------------------------|--------------------|--------------|
| Ni-SPE                                                                                    | Electrochemical | 0.25-25 $\mu$ M                                     | 74 nM              | [1]          |
| Molecularly cortisol imprinted acrylamide polymers on fullerene modified carbon electrode | Electrochemical | 0.5 – 64 nM                                         | 0.14 nM            | [2]          |
| EA/CORT-Ab/SH-PEG-COOH/AuNPs/MoS <sub>2</sub> /AuNPs modified immunosensor                | Electrochemical | 0.5-200 nM                                          | 0.11 nM            | [3]          |
| Au electrodes functionalized by alkaline phosphate enzyme                                 | Electrochemical |                                                     | 0.76 nM            | [4]          |
| ZnO/GR/PGE                                                                                | Electrochemical | 5 x 10 <sup>-10</sup> M - 115 x 10 <sup>-10</sup> M | 0.15 nM            | Current work |

**Table 2S** Reproducibility study of ZnO/GR/PGE

| Working electrode | Cathodic potential (V) | Cathodic Peak current density (Acm <sup>-2</sup> ) | RSD (%) |
|-------------------|------------------------|----------------------------------------------------|---------|
| ZnO/GR/PGE        |                        |                                                    |         |
| 1                 | -0.58                  | 3.78 x 10 <sup>-3</sup>                            | 0.72    |
| 2                 | -0.58                  | 3.78 x 10 <sup>-4</sup>                            | 0.72    |
| 3                 | -0.585                 | 3.76 x 10 <sup>-3</sup>                            | 0.78    |
| 4                 | -0.589                 | 3.76 x 10 <sup>-3</sup>                            | 0.78    |
| 5                 | -0.592                 | 3.73 x 10 <sup>-3</sup>                            | 0.86    |

- <sup>a</sup> Mean value of five determinations.
- Concentration of cortisol taken is 6 nM

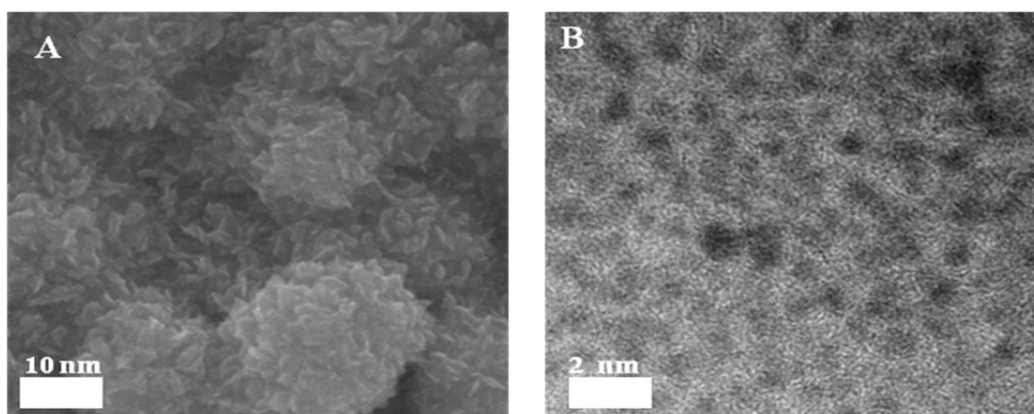

**Fig 7S.** (A) SEM image of ZnO/GR/PGE after cortisol detection and (B) TEM image of ZnO/GR/PGE after cortisol detection.

## References

- 1 A. Gevaerd, E. Y. Watanabe, C. Belli, L. H. Marcolino-Junior and M. F. Bergamini, *Sens. Actuators, B*, 2021, **332**, 129532–129566, DOI: 10.1016/j.snb.2021.129532.
- 2 H. D. E. Uygun, Z. O. Uygun, E. Canbay, F. G. Sağın and E. Sezer, *Talanta*, 2020, **206**, 120225–120230, DOI: 10.1016/j.talanta.2019.120225.

- 3 J. Liu, N. Xu, H. Men, S. Li, Y. Lu, S.S. Low and Q. Liu, *Sensors*, 2020, **20**, 1422–1437, DOI: 10.3390/s20051422.
- 4 K. Sun, N. Ramgir and S. Bhansali, *Sens.Actuators,B*, 2008, **133**, 533–537, DOI: 10.1016/j.snb.2008.03.018.
